# Supplementary material
Source: PubMed Central journal article supplement (PMC4720992)
Supplement: NIHMS65743-supplement-2.pdf [file NIHMS65743-supplement-2.pdf]

**Supplementary Table 1. Differentially expressed transcripts between NCR<sup>+</sup>Roryt<sup>hi</sup> and NCR<sup>+</sup>Roryt<sup>int</sup> ILC3 cells.** Shown is the normalized mean fold change between the wild-type Roryt<sup>hi</sup> and Roryt<sup>int</sup> NCR<sup>+</sup> ILC3 cells (P<0.05). Average expression is shown as the reads per kilobase per million (RPKM). Differentially expressed transcripts are expressed at >0.5 RPKM in at least one sample. Data are the mean of two independent experiments.

| EntrezID | Gene Symbol     | Log Fold Change<br>NCR <sup>+</sup> Roryt <sup>hi</sup> vs.<br>NCR <sup>+</sup> Roryt <sup>int</sup> | Average<br>Expression<br>Log2 | Adjusted<br>P Value |
|----------|-----------------|------------------------------------------------------------------------------------------------------|-------------------------------|---------------------|
| 20304    | <i>Ccl5</i>     | 3.09                                                                                                 | 1.48                          | 0.00019             |
| 14938    | <i>Gzma</i>     | 2.14                                                                                                 | -0.94                         | 0.13019             |
| 60504    | <i>Il21r</i>    | 1.95                                                                                                 | 2.73                          | 0.13101             |
| 16643    | <i>Klrd1</i>    | 1.77                                                                                                 | 0.91                          | 0.01325             |
| 241041   | <i>Gm4956</i>   | 1.73                                                                                                 | 2.04                          | 0.16598             |
| 12502    | <i>Cd3g</i>     | 1.60                                                                                                 | 2.58                          | 0.13019             |
| 16642    | <i>Klrc2</i>    | 1.57                                                                                                 | -0.32                         | 0.06301             |
| 80876    | <i>Ifitm2</i>   | 1.41                                                                                                 | 2.00                          | 0.04084             |
| 20303    | <i>Ccl4</i>     | 1.40                                                                                                 | 1.55                          | 0.00145             |
| 17395    | <i>Mmp9</i>     | 1.27                                                                                                 | 2.69                          | 0.05660             |
| 11540    | <i>Adora2a</i>  | 1.24                                                                                                 | 3.86                          | 0.22225             |
| 12774    | <i>Ccr5</i>     | 1.15                                                                                                 | 4.02                          | 0.01764             |
| 503550   | <i>Klri1</i>    | 1.15                                                                                                 | -0.94                         | 0.38451             |
| 16641    | <i>Klrc1</i>    | 1.14                                                                                                 | 1.68                          | 0.06244             |
| 16162    | <i>Il12rb2</i>  | 1.13                                                                                                 | 3.76                          | 0.10378             |
| 20302    | <i>Ccl3</i>     | 1.13                                                                                                 | 1.87                          | 0.06217             |
| 433470   | <i>AA467197</i> | 1.08                                                                                                 | 0.07                          | 0.23871             |
| 14103    | <i>Fasl</i>     | 1.06                                                                                                 | 2.56                          | 0.00410             |
| 216233   | <i>Socs2</i>    | 1.02                                                                                                 | 5.33                          | 0.05550             |
| 231507   | <i>Plac8</i>    | 0.96                                                                                                 | 5.47                          | 0.43952             |
| 13011    | <i>Cst7</i>     | 0.96                                                                                                 | 2.80                          | 0.06793             |
| 12769    | <i>Ccr9</i>     | 0.95                                                                                                 | 5.63                          | 0.36106             |
| 56193    | <i>Plek</i>     | 0.91                                                                                                 | 4.89                          | 0.02580             |
| 74777    | <i>Sepn1</i>    | 0.91                                                                                                 | 4.37                          | 0.02580             |
| 72310    | <i>Nkg7</i>     | 0.88                                                                                                 | 5.08                          | 0.33419             |
| 244233   | <i>Cd163l1</i>  | 0.86                                                                                                 | 5.53                          | 0.13019             |
| 16365    | <i>Irg1</i>     | 0.85                                                                                                 | 1.61                          | 0.34694             |
| 12306    | <i>Anxa2</i>    | 0.84                                                                                                 | 4.54                          | 0.10613             |
| 106878   | <i>Smim3</i>    | 0.84                                                                                                 | 4.47                          | 0.32117             |
| 74318    | <i>Hopx</i>     | 0.84                                                                                                 | 3.01                          | 0.18351             |
| 13537    | <i>Dusp2</i>    | 0.81                                                                                                 | 2.72                          | 0.36245             |

|           |                  |      |      |         |
|-----------|------------------|------|------|---------|
| 12310     | <i>Calca</i>     | 0.81 | 2.13 | 0.40004 |
| 100125262 | <i>Trbc1</i>     | 0.80 | 5.68 | 0.16598 |
| 72058     | <i>Igsf5</i>     | 0.79 | 4.29 | 0.04084 |
| 100503190 | <i>Gm19585</i>   | 0.79 | 3.18 | 0.03120 |
| 80981     | <i>Arl4d</i>     | 0.78 | 3.87 | 0.37739 |
| 227326    | <i>Gpr55</i>     | 0.78 | 4.04 | 0.07027 |
| 72043     | <i>Sulf2</i>     | 0.77 | 3.37 | 0.20508 |
| 16852     | <i>Lgals1</i>    | 0.76 | 3.98 | 0.13019 |
| 94212     | <i>Pag1</i>      | 0.76 | 7.06 | 0.06217 |
| 13849     | <i>Ephx1</i>     | 0.75 | 2.89 | 0.32117 |
| 60361     | <i>Ms4a4b</i>    | 0.75 | 2.10 | 0.16598 |
| 16963     | <i>Xcl1</i>      | 0.74 | 5.77 | 0.11026 |
| 20556     | <i>Sfn2</i>      | 0.67 | 4.67 | 0.20761 |
| 320712    | <i>Abi3bp</i>    | 0.64 | 5.87 | 0.05550 |
| 18647     | <i>Cdk14</i>     | 0.60 | 3.15 | 0.20416 |
| 57765     | <i>Tbx21</i>     | 0.60 | 6.23 | 0.26436 |
| 320207    | <i>Pik3r5</i>    | 0.59 | 5.47 | 0.41998 |
| 16854     | <i>Lgals3</i>    | 0.59 | 2.75 | 0.27486 |
| 107576    | <i>Tcrg-C4</i>   | 0.58 | 5.33 | 0.45035 |
| 20719     | <i>Serpinb6a</i> | 0.58 | 4.27 | 0.29940 |
| 14866     | <i>Gstm5</i>     | 0.57 | 4.96 | 0.29605 |
| 12047     | <i>Bcl2a1d</i>   | 0.56 | 5.39 | 0.33419 |
| 16541     | <i>Napsa</i>     | 0.55 | 4.91 | 0.45121 |
| 102278    | <i>Cpne7</i>     | 0.55 | 3.90 | 0.10256 |
| 12772     | <i>Ccr2</i>      | 0.54 | 6.38 | 0.22593 |
| 20779     | <i>Src</i>       | 0.54 | 5.17 | 0.30811 |
| 71887     | <i>Ppm1j</i>     | 0.53 | 2.24 | 0.41998 |
| 56338     | <i>Txnip</i>     | 0.53 | 6.33 | 0.20608 |
| 102680    | <i>Slc6a20a</i>  | 0.52 | 2.00 | 0.46260 |
| 71839     | <i>Osgin1</i>    | 0.52 | 6.05 | 0.22121 |
| 13611     | <i>S1pr4</i>     | 0.52 | 4.11 | 0.38496 |
| 15978     | <i>Ifng</i>      | 0.51 | 4.24 | 0.26409 |
| 16848     | <i>Lfng</i>      | 0.49 | 5.60 | 0.13695 |
| 71795     | <i>Pitpnc1</i>   | 0.48 | 6.26 | 0.25229 |
| 18576     | <i>Pde3b</i>     | 0.48 | 6.95 | 0.44032 |
| 30938     | <i>Fgd3</i>      | 0.48 | 6.62 | 0.16598 |
| 12045     | <i>Bcl2a1b</i>   | 0.48 | 5.68 | 0.32867 |
| 19219     | <i>Ptger4</i>    | 0.48 | 4.46 | 0.43544 |
| 57816     | <i>Tesc</i>      | 0.45 | 3.83 | 0.46260 |
| 24075     | <i>Taf10</i>     | 0.42 | 4.72 | 0.41998 |

|        |                |       |       |         |
|--------|----------------|-------|-------|---------|
| 83921  | <i>Tmem2</i>   | 0.40  | 5.89  | 0.40163 |
| 216558 | <i>Ugp2</i>    | 0.39  | 5.60  | 0.20356 |
| 232023 | <i>Vopp1</i>   | 0.38  | 5.69  | 0.45121 |
| 207952 | <i>Klhl25</i>  | 0.37  | 5.84  | 0.24492 |
| 240354 | <i>Malt1</i>   | 0.37  | 6.39  | 0.32867 |
| 14360  | <i>Fyn</i>     | 0.35  | 7.74  | 0.45121 |
| 107029 | <i>Me2</i>     | 0.35  | 6.66  | 0.40567 |
| 78523  | <i>Mrpl9</i>   | 0.33  | 5.89  | 0.30356 |
| 26401  | <i>Map3k1</i>  | 0.33  | 7.11  | 0.43952 |
| 13032  | <i>Ctsc</i>    | 0.33  | 5.99  | 0.40004 |
| 15900  | <i>Irf8</i>    | 0.33  | 6.53  | 0.42734 |
| 67245  | <i>Peli1</i>   | 0.30  | 7.29  | 0.37900 |
| 100201 | <i>Tmem64</i>  | 0.27  | 9.60  | 0.41911 |
| 192193 | <i>Edem1</i>   | -0.32 | 8.77  | 0.41998 |
| 16438  | <i>Itpr1</i>   | -0.33 | 8.37  | 0.35779 |
| 12263  | <i>C2</i>      | -0.34 | 6.48  | 0.40119 |
| 108116 | <i>Slco3a1</i> | -0.38 | 6.73  | 0.41998 |
| 230674 | <i>Kdm4a</i>   | -0.39 | 6.85  | 0.38496 |
| 234839 | <i>Piezo1</i>  | -0.39 | 8.03  | 0.41998 |
| 66184  | <i>Rps4l</i>   | -0.39 | 4.20  | 0.45714 |
| 20409  | <i>Ostf1</i>   | -0.40 | 9.17  | 0.20356 |
| 20442  | <i>St3gal1</i> | -0.40 | 6.84  | 0.43912 |
| 208144 | <i>Dhx37</i>   | -0.41 | 6.59  | 0.22225 |
| 209590 | <i>Il23r</i>   | -0.42 | 8.66  | 0.35770 |
| 64011  | <i>Nrgn</i>    | -0.43 | 7.54  | 0.41998 |
| 434794 | <i>Xlr4a</i>   | -0.44 | 5.00  | 0.38496 |
| 109108 | <i>Slc30a9</i> | -0.46 | 6.23  | 0.40617 |
| 54672  | <i>Gpr97</i>   | -0.47 | 7.27  | 0.13437 |
| 227937 | <i>Pkp4</i>    | -0.47 | 7.12  | 0.37739 |
| 69550  | <i>Bst2</i>    | -0.47 | 6.70  | 0.20416 |
| 20971  | <i>Sdc4</i>    | -0.49 | 9.52  | 0.15302 |
| 227659 | <i>Slc2a6</i>  | -0.50 | 7.14  | 0.32867 |
| 71330  | <i>Rcbtb1</i>  | -0.51 | 5.44  | 0.40374 |
| 56089  | <i>Ramp3</i>   | -0.51 | 10.57 | 0.30811 |
| 230316 | <i>Megf9</i>   | -0.52 | 5.18  | 0.32221 |
| 170768 | <i>Pfkfb3</i>  | -0.52 | 7.92  | 0.06699 |
| 26432  | <i>Plod2</i>   | -0.53 | 5.99  | 0.32867 |
| 15945  | <i>Cxcl10</i>  | -0.54 | 7.19  | 0.32117 |
| 11426  | <i>Macf1</i>   | -0.55 | 9.58  | 0.22225 |
| 20441  | <i>St3gal3</i> | -0.55 | 7.24  | 0.02952 |

|           |                           |       |       |         |
|-----------|---------------------------|-------|-------|---------|
| 328329    | <i>Mast4</i>              | -0.57 | 8.90  | 0.41207 |
| 20975     | <i>Synj2</i>              | -0.58 | 5.91  | 0.10054 |
| 16428     | <i>Itk</i>                | -0.62 | 9.98  | 0.27121 |
| 105841    | <i>Dennd3</i>             | -0.63 | 6.28  | 0.42164 |
| 100502618 | <i>Gm19288</i>            | -0.63 | 3.31  | 0.32854 |
| 68328     | <i>Rab13</i>              | -0.64 | 3.01  | 0.45121 |
| 73205     | <i>3110043021<br/>Rik</i> | -0.65 | 6.47  | 0.40617 |
| 17084     | <i>Ly86</i>               | -0.67 | 4.09  | 0.06258 |
| 67375     | <i>Qprt</i>               | -0.68 | 4.39  | 0.37208 |
| 15402     | <i>Hoxa5</i>              | -0.68 | 4.79  | 0.28862 |
| 229776    | <i>Cdc14a</i>             | -0.69 | 7.07  | 0.29706 |
| 66895     | <i>Pxdc1</i>              | -0.69 | 10.07 | 0.01226 |
| 110596    | <i>Arhgef28</i>           | -0.71 | 6.76  | 0.11545 |
| 21943     | <i>Tnfsf11</i>            | -0.72 | 10.87 | 0.40163 |
| 97064     | <i>Wwtr1</i>              | -0.73 | 6.65  | 0.12582 |
| 12775     | <i>Ccr7</i>               | -0.74 | 4.91  | 0.22225 |
| 16001     | <i>Igf1r</i>              | -0.75 | 7.81  | 0.01839 |
| 50768     | <i>Dlc1</i>               | -0.75 | 6.98  | 0.05550 |
| 70470     | <i>Rprd1b</i>             | -0.77 | 7.86  | 0.17557 |
| 66616     | <i>Snx9</i>               | -0.78 | 4.72  | 0.22593 |
| 68180     | <i>Hyi</i>                | -0.79 | 3.59  | 0.31681 |
| 13830     | <i>Stom</i>               | -0.85 | 7.11  | 0.18662 |
| 239650    | <i>Al836003</i>           | -0.87 | 7.73  | 0.13101 |
| 56464     | <i>Ctsf</i>               | -0.88 | 4.94  | 0.22225 |
| 20198     | <i>S100a4</i>             | -0.92 | 5.05  | 0.21515 |
| 666938    | <i>Bend4</i>              | -0.94 | 6.65  | 0.39765 |
| 19713     | <i>Ret</i>                | -1.00 | 8.86  | 0.13019 |
| 225994    | <i>Nmrk1</i>              | -1.00 | 6.80  | 0.32066 |
| 65221     | <i>Slc15a3</i>            | -1.01 | 7.89  | 0.02580 |
| 12954     | <i>Cryaa</i>              | -1.02 | 7.29  | 0.17623 |
| 116849    | <i>Il1f1b</i>             | -1.03 | 6.69  | 0.29179 |
| 11810     | <i>Apobec1</i>            | -1.04 | 4.94  | 0.20508 |
| 50929     | <i>Il22</i>               | -1.04 | 10.44 | 0.11010 |
| 17064     | <i>Cd93</i>               | -1.05 | 9.53  | 0.00355 |
| 100736249 | <i>Mira</i>               | -1.05 | 2.72  | 0.30356 |
| 21817     | <i>Tgm2</i>               | -1.07 | 8.94  | 0.20416 |
| 12504     | <i>Cd4</i>                | -1.10 | 5.76  | 0.00557 |
| 22339     | <i>Vegfa</i>              | -1.11 | 9.16  | 0.25743 |
| 67800     | <i>Dgat2</i>              | -1.13 | 5.07  | 0.40004 |

|        |                |       |      |         |
|--------|----------------|-------|------|---------|
| 16177  | <i>Il1r1</i>   | -1.15 | 8.58 | 0.01451 |
| 16878  | <i>Lif</i>     | -1.17 | 7.31 | 0.00410 |
| 13388  | <i>Dll1</i>    | -1.19 | 6.95 | 0.06464 |
| 20312  | <i>Cx3cl1</i>  | -1.21 | 9.69 | 0.00477 |
| 114249 | <i>Npnt</i>    | -1.25 | 5.93 | 0.41998 |
| 12145  | <i>Cxcr5</i>   | -1.33 | 7.27 | 0.01457 |
| 18566  | <i>Pdcd1</i>   | -1.38 | 6.19 | 0.13019 |
| 64292  | <i>Ptges</i>   | -1.40 | 6.65 | 0.06699 |
| 12458  | <i>Ccr6</i>    | -1.45 | 4.92 | 0.13437 |
| 219148 | <i>Fam167a</i> | -1.47 | 5.89 | 0.00355 |
| 94353  | <i>Hmgn3</i>   | -1.53 | 4.35 | 0.03091 |

**Supplementary Table 2. Differentially expressed transcripts between wild-type and *Tbx21*<sup>+/-</sup> NCR<sup>+</sup>Roryt<sup>hi</sup> ILC3 cells.** Shown is the normalized mean fold change between the wild-type and *Tbx21*<sup>+/-</sup> Roryt<sup>hi</sup> NCR<sup>+</sup> ILC3 cells (P<0.05). Average expression is shown as the reads per kilobase per million (RPKM). Differentially expressed transcripts are expressed at >0.5 RPKM in at least one sample. Data are the mean of two independent experiments.

| EntrezID  | Gene Symbol     | Log Fold Change wild-type vs. <i>Tbx21</i> <sup>+/-</sup> | Average Expression Log2 | Adjusted P Value |
|-----------|-----------------|-----------------------------------------------------------|-------------------------|------------------|
| 20303     | <i>Ccl4</i>     | 4.02                                                      | 1.55                    | 0.00000036       |
| 16162     | <i>Il12rb2</i>  | 3.93                                                      | 3.76                    | 0.00002          |
| 320407    | <i>Klri2</i>    | 3.81                                                      | 3.87                    | 0.0000038        |
| 503550    | <i>Klri1</i>    | 3.18                                                      | -0.94                   | 0.00630          |
| 16643     | <i>Klrd1</i>    | 3.15                                                      | 0.91                    | 0.00043          |
| 20304     | <i>Ccl5</i>     | 2.90                                                      | 1.48                    | 0.00003          |
| 20302     | <i>Ccl3</i>     | 2.76                                                      | 1.87                    | 0.00013          |
| 12310     | <i>Calca</i>    | 2.57                                                      | 2.13                    | 0.00125          |
| 16642     | <i>Klrc2</i>    | 2.53                                                      | -0.32                   | 0.00272          |
| 14103     | <i>Fasl</i>     | 2.41                                                      | 2.56                    | 0.0000038        |
| 12945     | <i>Dmbt1</i>    | 2.34                                                      | 4.55                    | 0.10486          |
| 102680    | <i>Slc6a20a</i> | 2.34                                                      | 2.00                    | 0.00007          |
| 16365     | <i>Irg1</i>     | 2.32                                                      | 1.61                    | 0.00220          |
| 56193     | <i>Plek</i>     | 2.29                                                      | 4.89                    | 0.00002          |
| 14079     | <i>Fabp2</i>    | 2.28                                                      | 0.88                    | 0.09178          |
| 231507    | <i>Plac8</i>    | 2.23                                                      | 5.47                    | 0.00424          |
| 20501     | <i>Slc16a1</i>  | 2.18                                                      | 3.86                    | 0.00906          |
| 70163     | <i>Lypd8</i>    | 2.11                                                      | 3.12                    | 0.11782          |
| 22264     | <i>Prap1</i>    | 2.09                                                      | 0.93                    | 0.07118          |
| 74318     | <i>Hopx</i>     | 2.08                                                      | 3.01                    | 0.00081          |
| 80981     | <i>Arl4d</i>    | 2.08                                                      | 3.87                    | 0.00189          |
| 16669     | <i>Krt19</i>    | 2.04                                                      | 4.06                    | 0.12352          |
| 60361     | <i>Ms4a4b</i>   | 2.03                                                      | 2.10                    | 0.00043          |
| 80876     | <i>Ifitm2</i>   | 1.93                                                      | 2.00                    | 0.00229          |
| 106878    | <i>Smim3</i>    | 1.85                                                      | 4.47                    | 0.00248          |
| 100043314 | <i>Tigit</i>    | 1.79                                                      | 3.15                    | 0.01603          |
| 17395     | <i>Mmp9</i>     | 1.78                                                      | 2.69                    | 0.00229          |
| 54200     | <i>Sult2b1</i>  | 1.77                                                      | 2.92                    | 0.03999          |
| 20411     | <i>Sorbs1</i>   | 1.75                                                      | 4.73                    | 0.00264          |

|           |                 |      |       |         |
|-----------|-----------------|------|-------|---------|
| 12557     | <i>Cdh17</i>    | 1.65 | 4.11  | 0.05783 |
| 14728     | <i>Lilrb4</i>   | 1.65 | 5.25  | 0.00229 |
| 60504     | <i>Il21r</i>    | 1.64 | 2.73  | 0.05719 |
| 12774     | <i>Ccr5</i>     | 1.64 | 4.02  | 0.00061 |
| 14938     | <i>Gzma</i>     | 1.64 | -0.94 | 0.06706 |
| 66616     | <i>Snx9</i>     | 1.62 | 4.72  | 0.00631 |
| 17059     | <i>Klrb1c</i>   | 1.62 | 4.94  | 0.03366 |
| 14942     | <i>Gzme</i>     | 1.55 | 1.80  | 0.00533 |
| 104215    | <i>Rhoq</i>     | 1.48 | 6.31  | 0.10789 |
| 327812    | <i>Gm15663</i>  | 1.48 | 3.09  | 0.00125 |
| 18669     | <i>Abcb1b</i>   | 1.47 | 7.05  | 0.04143 |
| 74777     | <i>Sepr1</i>    | 1.46 | 4.37  | 0.00043 |
| 16641     | <i>Klrc1</i>    | 1.46 | 1.68  | 0.00451 |
| 74007     | <i>Btbd11</i>   | 1.43 | 6.30  | 0.09479 |
| 14727     | <i>Gp49a</i>    | 1.40 | 4.14  | 0.00553 |
| 11931     | <i>Atp1b1</i>   | 1.37 | 3.82  | 0.10737 |
| 17357     | <i>Marcks1</i>  | 1.37 | 7.59  | 0.05533 |
| 54132     | <i>Pdlim1</i>   | 1.37 | 2.68  | 0.05924 |
| 22234     | <i>Ugcg</i>     | 1.32 | 8.30  | 0.00155 |
| 75345     | <i>Slamf7</i>   | 1.28 | 3.18  | 0.03651 |
| 16854     | <i>Lgals3</i>   | 1.23 | 2.75  | 0.00229 |
| 15978     | <i>Ifng</i>     | 1.21 | 4.24  | 0.00104 |
| 20539     | <i>Slc7a5</i>   | 1.19 | 5.98  | 0.02862 |
| 21817     | <i>Tgm2</i>     | 1.17 | 8.94  | 0.04855 |
| 104252    | <i>Cdc42ep2</i> | 1.15 | 3.22  | 0.00426 |
| 56449     | <i>Ybx3</i>     | 1.15 | 5.22  | 0.04956 |
| 13875     | <i>Erf</i>      | 1.13 | 6.06  | 0.02645 |
| 100114901 | <i>Trdv4</i>    | 1.12 | 1.08  | 0.12533 |
| 23962     | <i>Oasl2</i>    | 1.11 | 6.20  | 0.09330 |
| 13388     | <i>Dll1</i>     | 1.09 | 6.95  | 0.04423 |
| 227326    | <i>Gpr55</i>    | 1.07 | 4.04  | 0.00327 |
| 100503190 | <i>Gm19585</i>  | 1.07 | 3.18  | 0.00160 |
| 12775     | <i>Ccr7</i>     | 1.06 | 4.91  | 0.02952 |
| 631323    | <i>Gm12250</i>  | 1.06 | 3.43  | 0.00591 |
| 140917    | <i>Dclre1b</i>  | 1.05 | 4.33  | 0.02655 |
| 30938     | <i>Fgd3</i>     | 1.04 | 6.62  | 0.00076 |
| 242819    | <i>Rundc3b</i>  | 1.03 | 6.42  | 0.04833 |
| 13666     | <i>Eif2ak3</i>  | 1.02 | 5.55  | 0.02167 |

|          |                                 |       |      |         |
|----------|---------------------------------|-------|------|---------|
| 80914    | <i>Uck2</i>                     | 1.02  | 4.89 | 0.11383 |
| 216233   | <i>Socs2</i>                    | 1.01  | 5.33 | 0.01270 |
| 320207   | <i>Pik3r5</i>                   | 1.01  | 5.47 | 0.01573 |
| 51813    | <i>Ccnc</i>                     | 1.01  | 4.78 | 0.00591 |
| 228140   | <i>Tnks1bp1</i>                 | 1.00  | 5.60 | 0.00317 |
| 22271    | <i>Upp1</i>                     | -1.00 | 6.43 | 0.00673 |
| 18582    | <i>Pde6d</i>                    | -1.00 | 4.47 | 0.11536 |
| 70561    | <i>Txndc16</i>                  | -1.01 | 5.03 | 0.09335 |
| 170748   | <i>Smco4</i>                    | -1.01 | 3.62 | 0.04190 |
| 57890    | <i>Il17re</i>                   | -1.01 | 6.08 | 0.08328 |
| 51791    | <i>Rgs14</i>                    | -1.02 | 4.47 | 0.04478 |
| 73739    | <i>Cby1</i>                     | -1.03 | 3.07 | 0.07884 |
| 241274   | <i>Pnpla7</i>                   | -1.03 | 6.88 | 0.01833 |
| 66531    | <i>Cmc2</i>                     | -1.03 | 4.98 | 0.06387 |
| 217151   | <i>Arl5c</i>                    | -1.04 | 5.74 | 0.01957 |
| 13860    | <i>Eps8</i>                     | -1.05 | 5.01 | 0.07064 |
| 76602    | <i>1700040D17</i><br><i>Rik</i> | -1.05 | 2.78 | 0.11769 |
| 10012643 | <i>Trgj1</i>                    | -1.07 | 0.72 | 0.11070 |
| 70082    | <i>Lysmd2</i>                   | -1.08 | 4.40 | 0.08718 |
| 73218    | <i>Sppl2b</i>                   | -1.09 | 6.38 | 0.07799 |
| 666794   | <i>Rbm24</i>                    | -1.09 | 4.31 | 0.01293 |
| 107576   | <i>Tcrg-C4</i>                  | -1.09 | 5.33 | 0.00640 |
| 99662    | <i>Eps8l3</i>                   | -1.09 | 5.09 | 0.11528 |
| 67014    | <i>Mina</i>                     | -1.09 | 4.71 | 0.10602 |
| 320747   | <i>Lingo4</i>                   | -1.10 | 5.65 | 0.07929 |
| 19713    | <i>Ret</i>                      | -1.10 | 8.86 | 0.02297 |
| 226090   | <i>Ermp1</i>                    | -1.12 | 6.36 | 0.05930 |
| 106952   | <i>Arap3</i>                    | -1.12 | 6.55 | 0.00424 |
| 71228    | <i>Dlg5</i>                     | -1.12 | 6.69 | 0.07712 |
| 14969    | <i>H2-Eb1</i>                   | -1.14 | 5.86 | 0.10496 |
| 116849   | <i>Itifb</i>                    | -1.16 | 6.69 | 0.05132 |
| 215789   | <i>Phactr2</i>                  | -1.17 | 6.54 | 0.04663 |
| 16992    | <i>Lta</i>                      | -1.17 | 4.46 | 0.09247 |
| 69288    | <i>Rhobtb1</i>                  | -1.17 | 5.24 | 0.11844 |
| 103268   | <i>Cep57l1</i>                  | -1.18 | 4.14 | 0.07884 |
| 108089   | <i>Rnf144a</i>                  | -1.20 | 5.46 | 0.08844 |
| 69069    | <i>1810011H11</i>               | -1.20 | 4.33 | 0.11111 |



| <i>Rik</i> |                 |       |       |         |
|------------|-----------------|-------|-------|---------|
| 17064      | <i>Cd93</i>     | -1.21 | 9.53  | 0.00030 |
| 50929      | <i>Il22</i>     | -1.21 | 10.44 | 0.01307 |
| 244233     | <i>Cd163l1</i>  | -1.22 | 5.53  | 0.00321 |
| 15482      | <i>Hspa1l</i>   | -1.23 | 4.80  | 0.03364 |
| 269633     | <i>Wdr86</i>    | -1.25 | 3.64  | 0.09247 |
| 625018     | <i>C4a</i>      | -1.27 | 5.54  | 0.07335 |
| 50786      | <i>Hs6st2</i>   | -1.28 | 6.89  | 0.00061 |
| 11472      | <i>Actn2</i>    | -1.28 | 3.38  | 0.00640 |
| 14229      | <i>Fkbp5</i>    | -1.28 | 5.85  | 0.05719 |
| 19141      | <i>Lgmn</i>     | -1.30 | 2.47  | 0.08844 |
| 12778      | <i>Ackr3</i>    | -1.31 | 5.92  | 0.07884 |
| 79196      | <i>Osbpl5</i>   | -1.32 | 4.89  | 0.04877 |
| 270152     | <i>Amica1</i>   | -1.33 | 5.67  | 0.04814 |
| 100217441  | <i>Snord23</i>  | -1.34 | 0.64  | 0.11898 |
| 100302593  | <i>Snord14d</i> | -1.35 | 0.48  | 0.12214 |
| 20200      | <i>S100a6</i>   | -1.35 | 3.36  | 0.04683 |
| 14667      | <i>Gm2a</i>     | -1.36 | 7.48  | 0.00160 |
| 12475      | <i>Cd14</i>     | -1.36 | 2.61  | 0.04565 |
| 23887      | <i>Ggt5</i>     | -1.36 | 5.09  | 0.01270 |
| 16543      | <i>Mdfic</i>    | -1.39 | 7.72  | 0.07711 |
| 19217      | <i>Ptger2</i>   | -1.40 | 5.95  | 0.02952 |
| 16476      | <i>Jun</i>      | -1.43 | 10.08 | 0.03556 |
| 319713     | <i>Ablim3</i>   | -1.43 | 7.11  | 0.00220 |
| 20198      | <i>S100a4</i>   | -1.44 | 5.05  | 0.00570 |
| 74091      | <i>Npl</i>      | -1.44 | 3.33  | 0.01270 |
| 68180      | <i>Hyi</i>      | -1.45 | 3.59  | 0.00364 |
| 320292     | <i>Rasgef1b</i> | -1.47 | 6.77  | 0.11732 |
| 193740     | <i>Hspa1a</i>   | -1.52 | 8.51  | 0.00985 |
| 240047     | <i>Mmp25</i>    | -1.54 | 4.17  | 0.00699 |
| 66412      | <i>Arrdc4</i>   | -1.56 | 9.19  | 0.01928 |
| 15511      | <i>Hspa1b</i>   | -1.62 | 9.14  | 0.01223 |
| 21632      | <i>Tcrg-V1</i>  | -1.67 | 0.14  | 0.10789 |
| 100302594  | <i>Snord14e</i> | -1.71 | 0.72  | 0.06149 |
| 71733      | <i>Susd2</i>    | -1.74 | 5.67  | 0.00229 |
| 378460     | <i>Pram1</i>    | -1.75 | 6.53  | 0.00953 |
| 13195      | <i>Ddc</i>      | -1.76 | 5.14  | 0.04423 |
| 17476      | <i>Mpeg1</i>    | -1.78 | 2.82  | 0.02297 |

|        |                                 |       |       |         |
|--------|---------------------------------|-------|-------|---------|
| 12502  | <i>Cd3g</i>                     | -1.80 | 2.58  | 0.00221 |
| 17105  | <i>Lyz2</i>                     | -1.81 | 2.80  | 0.01603 |
| 16176  | <i>Il1b</i>                     | -1.82 | 1.75  | 0.07335 |
| 76640  | <i>1700113H08</i><br><i>Rik</i> | -1.83 | 2.88  | 0.00692 |
| 20969  | <i>Sdc1</i>                     | -1.97 | 7.13  | 0.00079 |
| 14767  | <i>Nmur1</i>                    | -1.98 | 2.61  | 0.01037 |
| 11816  | <i>Apoe</i>                     | -2.06 | 4.18  | 0.04423 |
| 12259  | <i>C1qa</i>                     | -2.08 | 1.31  | 0.02554 |
| 12978  | <i>Csf1r</i>                    | -2.09 | 1.62  | 0.01308 |
| 16183  | <i>Il2</i>                      | -2.11 | 1.73  | 0.02952 |
| 108637 | <i>Snord14c</i>                 | -2.13 | -0.39 | 0.05350 |
| 18596  | <i>Pdgfrb</i>                   | -2.45 | 5.06  | 0.00021 |
| 73703  | <i>Dppa2</i>                    | -2.53 | 2.32  | 0.00104 |
| 12262  | <i>C1qc</i>                     | -2.57 | 0.68  | 0.02645 |
| 12260  | <i>C1qb</i>                     | -2.58 | -0.05 | 0.00591 |
| 12876  | <i>Cpe</i>                      | -2.94 | 4.15  | 0.00234 |
| 620750 | <i>Gm6177</i>                   | -5.28 | 0.60  | 0.00009 |

**Supplementary Table 3. Histological scoring of intestinal sections**

| Damage                  | Histological score |                            |                           |                           |                        |                   | Total |
|-------------------------|--------------------|----------------------------|---------------------------|---------------------------|------------------------|-------------------|-------|
|                         | 0                  | 1                          | 2                         | 3                         | 4                      | 5                 |       |
| Epithelial damage       | <i>Normal</i>      | <i>Hyper-proliferation</i> | <i>&lt;50% crypt loss</i> | <i>&lt;50% crypt loss</i> | <i>100% crypt loss</i> | <i>Ulceration</i> | 0-5   |
| Mucosal inflammation    | <i>None</i>        | <i>Mild</i>                | <i>Moderate</i>           | <i>Severe</i>             |                        |                   | 0-3   |
| Submucosal inflammation | <i>None</i>        | <i>Mild</i>                | <i>Moderate</i>           | <i>Severe</i>             |                        |                   | 0-3   |
|                         |                    |                            |                           |                           |                        | Maximum score     | 11    |
